# Supplementary material for: Copper(ii) and zinc(ii) ion binding properties of a MAP type branched ligand with histidines as surface functionalities
Source: Royal Society of Chemistry journal article supplement (doi:10.1039/b903721g), 2009-01-01
Supplement: b903721g.pdf [file b903721g.pdf]

## Electronic supplementary information

**Table S1.** The tentative assignment of the  $^1\text{H-NMR}$  signals: chemical shifts ( $\delta$ ) belonging to the Lys and His protons in the ligand at  $\text{pH}^* = 5.5$ .

| Sort of H                 | $\delta(\text{ppm})$ |           |
|---------------------------|----------------------|-----------|
|                           | Lys                  | His       |
| $\alpha\text{-CH}$        | 4.18-4.20            | 4.13-4.69 |
| $\beta\text{-CH}_2$       | 1.69-1.73            | 3.31-3.35 |
| $\gamma\text{-CH}_2$      | 1.24-1.39            | -         |
| $\delta\text{-CH}_2$      | 1.38-1.51            | -         |
| $\varepsilon\text{-CH}_2$ | 3.12-3.18            | -         |
| $\text{C}^5\text{H}$      | -                    | 7.36      |
| $\text{C}^2\text{H}$      | -                    | 8.65      |

**Fig. S1** Two dimensional COSY spectra of the free ligand at  $\text{pH}^* = 5.5$  in  $\text{H}_2\text{O}$  (containing 10%  $\text{D}_2\text{O}$ ).

**Fig. S2** Two dimensional TOCSY spectra of the free ligand at  $\text{pH}^* = 5.5$  in  $\text{H}_2\text{O}$  (containing 10%  $\text{D}_2\text{O}$ ).

**Fig. S3** Two dimensional ROESY spectra of the free ligand at  $\text{pH}^* = 5.5$  in  $\text{H}_2\text{O}$  (containing 10%  $\text{D}_2\text{O}$ ).

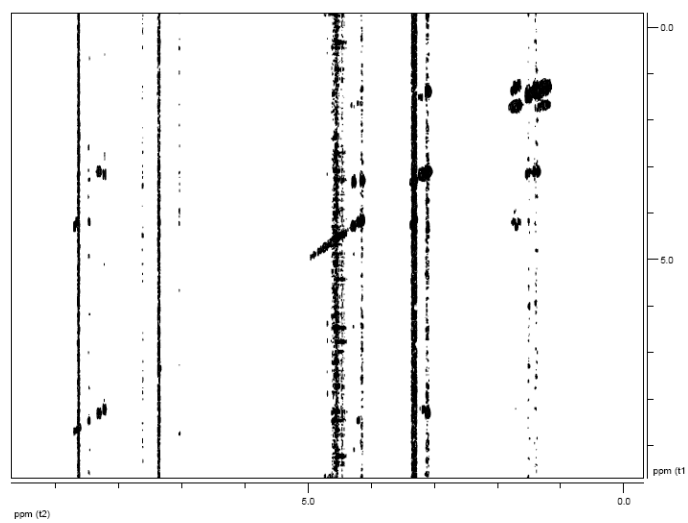

**Fig. S1**

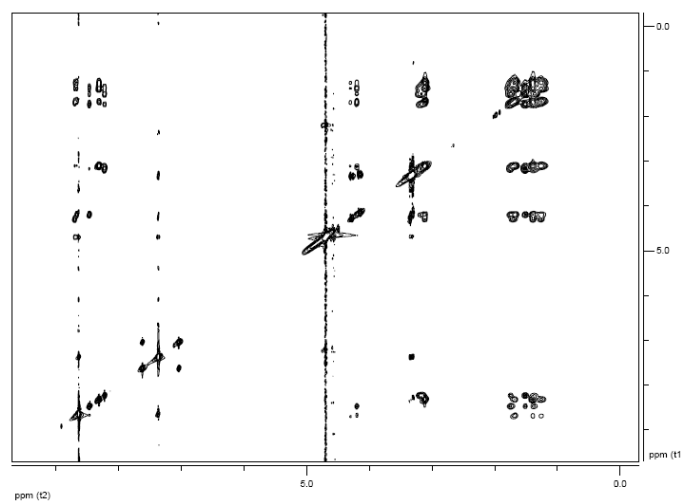

**Fig. S2**

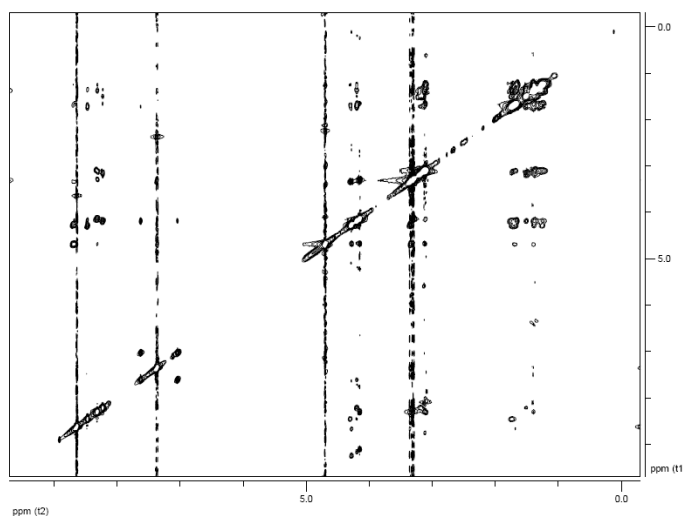

**Fig. S3**
